# Supplementary material for: Effects of length dispersity and film fabrication on the sheet resistance of copper nanowire transparent conductors
Source: Royal Society of Chemistry journal article supplement (doi:10.1039/c5nr03671b), 2015-01-01
Supplement: c5nr03671b1.pdf [file c5nr03671b1.pdf]

# Effects of Length Dispersity and Film Fabrication on the Sheet Resistance of Copper Nanowire Transparent Conductors

James W. Borchert,<sup>a</sup> Ian E. Stewart,<sup>b</sup> Shengrong Ye,<sup>b</sup> Aaron R. Rathmell,<sup>b</sup> Benjamin J. Wiley,<sup>b</sup> and Karen I. Winey\*<sup>a</sup>

<sup>a</sup> Department of Materials Science and Engineering, University of Pennsylvania, Philadelphia, Pennsylvania 19104. Email: winey@seas.upenn.edu

<sup>b</sup> Department of Chemistry, Duke University, 124 Science Drive, Box 90354, Durham, North Carolina 27708, USA

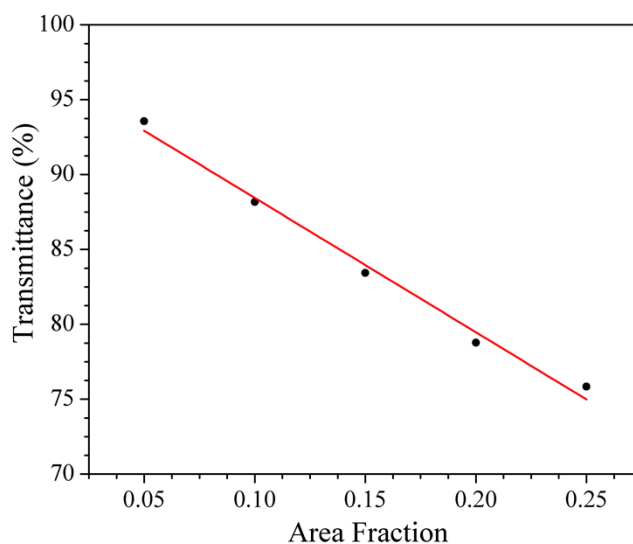

Figure S1: Calibration curve for the determination of Area Fraction from %T measurements of Cu NW films on PET. A linear fit was obtained using OriginPro 8.1. The fit details are as follows:

|    | Intercept |                | Slope     |                | Statistics    |
|----|-----------|----------------|-----------|----------------|---------------|
|    | Value     | Standard Error | Value     | Standard Error | Adj. R-Square |
| %T | 97.41234  | 0.84752        | -89.71336 | 5.11071        | 0.98714       |
